# Supplementary material
Source: PubMed Central journal article supplement (PMC3066175)
Supplement: NIHMS278937-supplement-Supp1.pdf [file NIHMS278937-supplement-Supp1.pdf]

| region      | Brodmann area(s) | center of mass |     |     | peak t-score in ROI for contrast |     |     |     |
|-------------|------------------|----------------|-----|-----|----------------------------------|-----|-----|-----|
|             |                  | x              | y   | z   | t score                          | x   | y   | z   |
| L STG       | 22/38            | -51            | 15  | -13 | 4.42                             | -51 | 15  | -13 |
| L STG/L PCG | 22/6             | -53            | -6  | 1   | 4.35                             | -55 | -6  | -1  |
| L MTG       | 37               | -43            | -51 | -1  | 3.75                             | -41 | -51 | -1  |
| L IFG       | 45/46            | -46            | 26  | 8   | 4.28                             | -46 | 27  | 9   |
| L PCG       | 6                | -56            | -11 | 38  | 3.73                             | -56 | -12 | 37  |
| R STG       | 22/38            | 55             | 2   | -8  | 4                                | 55  | 3   | -7  |
| R STG       | 38               | 37             | 3   | -14 | 3.78                             | 38  | 7   | -15 |
| R IFG       | 45               | 32             | 26  | 9   | 5.52                             | 36  | 26  | 9   |

Supplemental Table. Tailarach coordinates for voxel clusters that passed threshold ( $p < .005$ ) for sentences versus scrambled sentences presented at the normal rate. The t values and Tailarach coordinates of each cluster's peak voxel also are listed.

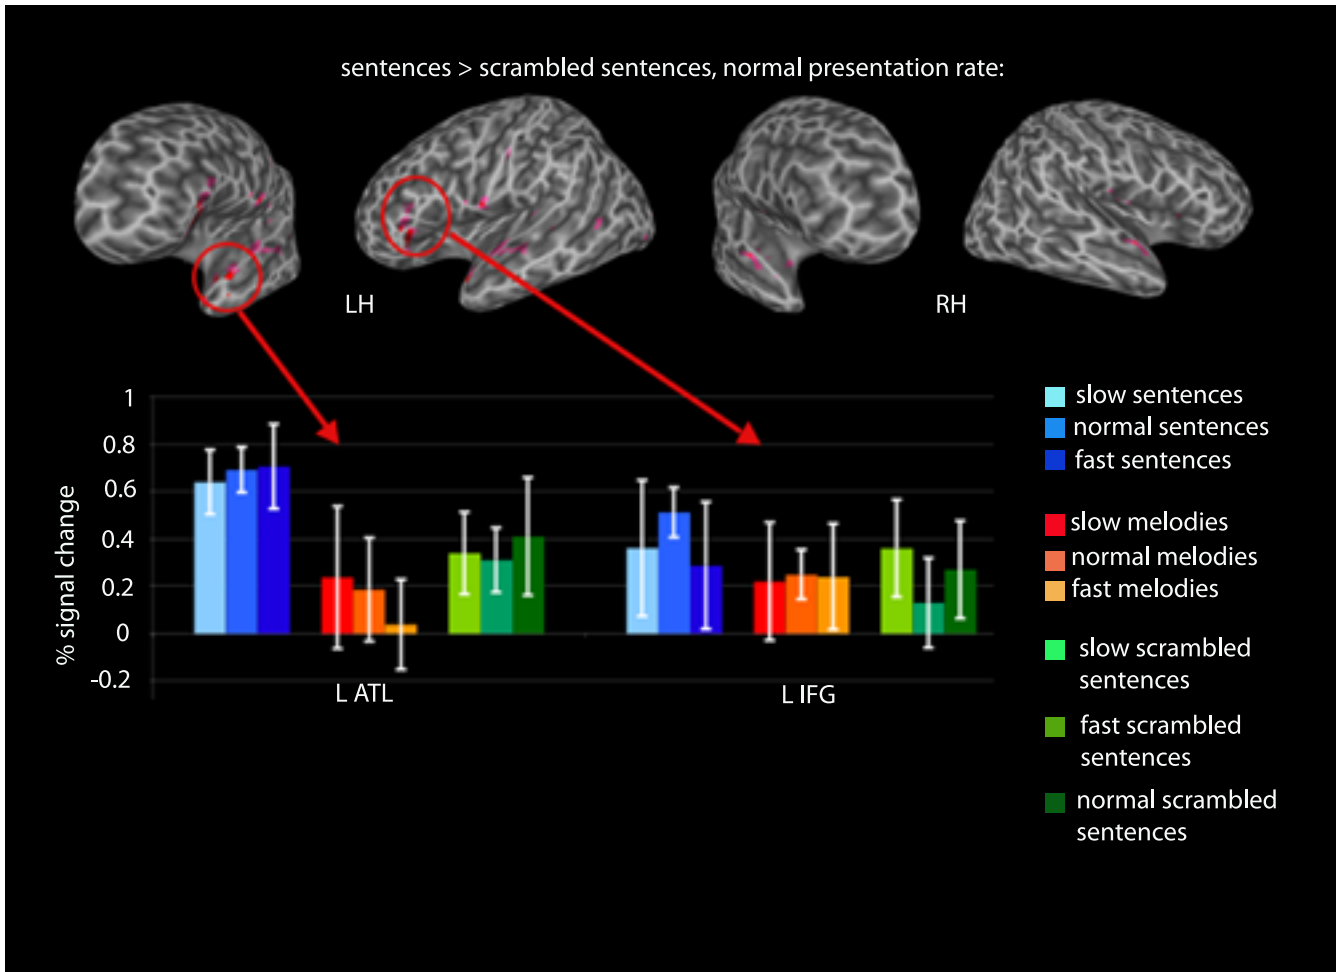

Supplemental Figure 1. Top. Voxels more active for sentences than scrambled sentences, at the normal presentation rate,  $p < .005$ . Bottom. Mean peak amplitudes for each stimulus type, at each presentation rate for the left ATL ROI and the L IFG ROI more active for sentences than scrambled sentences at the normal presentation rate. Error bars represent 95% confidence intervals.

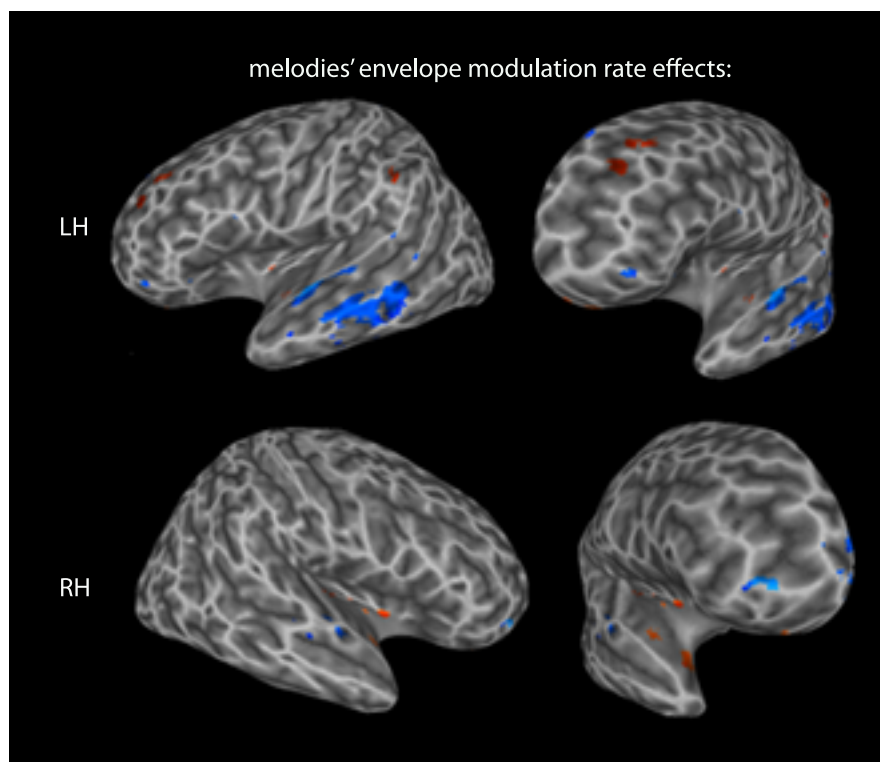

Supplemental Figure 2. Voxels whose activation is positively modulated by the envelope modulation rate of melodies (warm colors, also in Figure 6), and negatively modulated (cool colors),  $p > .005$ .
